# Supplementary material
Source: publisher figshare collection journal article supplement (https://acs.figshare.com/ndownloader/files/4456051)
Supplement: Supplementary file 1 [file 4456051]

**Supporting Information for the manuscript Long lived charge separated states induced by *t*-stilbene incorporation in the pores of Brønsted acidic HZSM-5 zeolites : Effect of gallium on the spontaneous ionization process by Alain Moissette<sup>†\*</sup>, Raul F. Lobo<sup>‡\*\*</sup>, Hervé Vezin<sup>†</sup>, Khalid A. Al-Majnoui<sup>‡</sup> and Claude Brémard<sup>†</sup>**

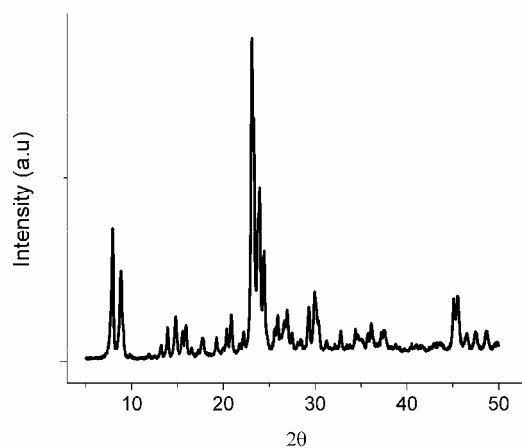

Figure S1: X-ray powder diffraction pattern of Ga\_ZSM5 after calcination and ion-exchanged into the ammonium form.

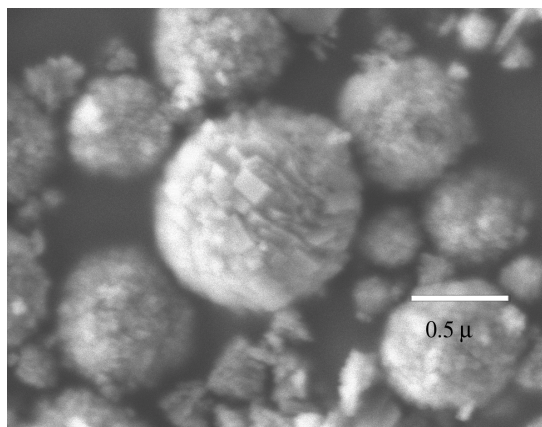

Figure S2: SEM image of as-synthesized Ga\_ZSM5

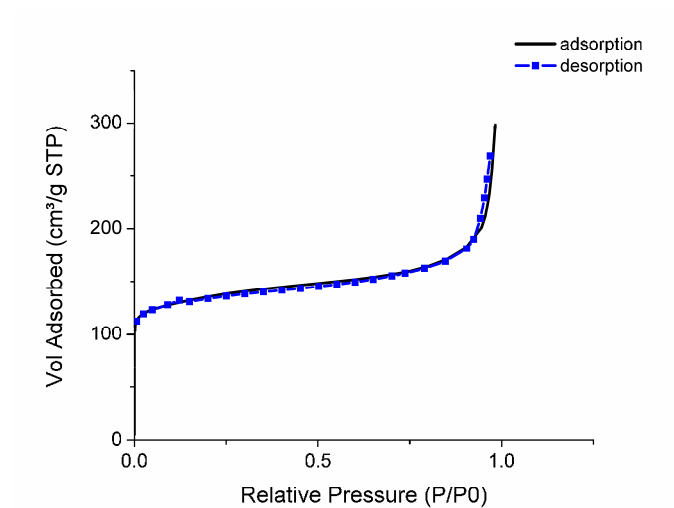

Figure S3: Nitrogen adsorption isotherm of H-GaZSM5.

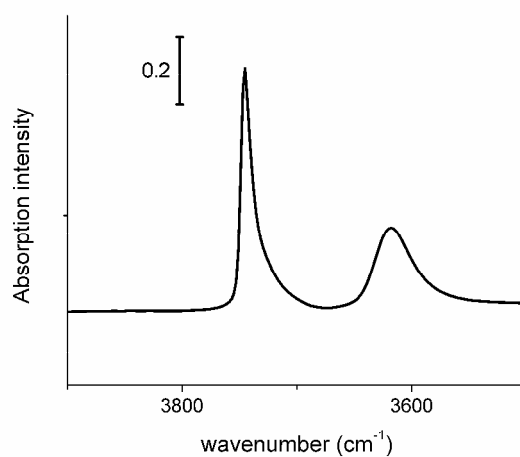

Figure S4: FTIR spectrum of H-Ga\_ZSM 5.

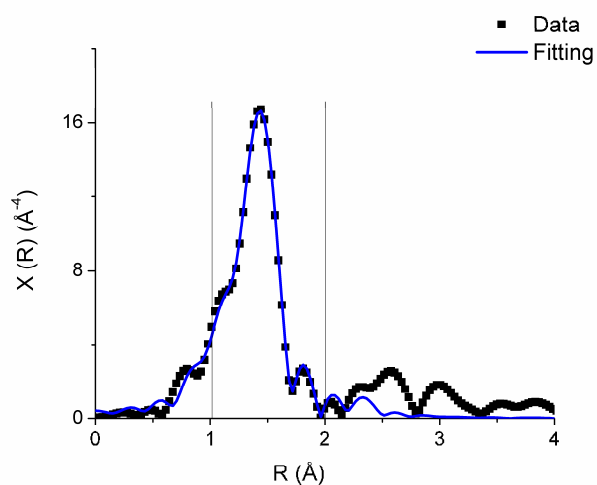

Figure S5: Extended X-ray absorption fine structure of Ga-ZSM5 in NH₄⁺ form in radial space and the fitting curve.

Reference:

- 1- C. Lamberti, G. T. Palomino, S. Bordiga, A. Zecchina, G. Spano, C. O. Arean, *Catalysis Lett.* 63 (1999) 213-216
- 2- K. Al-majnouni, N. Hould, D. Vlachos, R. Lobo, in prepration
